# Supplementary material for: Isoreticular Tp*–W–Cu–S cluster-based one-dimensional coordination polymers with an uncommon [Tp*WS3Cu2] + [Cu] combination and their third-order nonlinear optical properties
Source: Royal Society of Chemistry journal article supplement (doi:10.1039/c9ce00439d), 2019-01-01
Supplement: c9ce00439d1.pdf [file c9ce00439d1.pdf]

**Electronic Supplementary Information**

**Isorecticular Tp\*-W-Cu-S cluster-based one-dimensional coordination polymers with an uncommon [Tp\*WS<sub>3</sub>Cu<sub>2</sub>] + [Cu] combination and their third-order nonlinear optical properties**

Quan Liu,<sup>a</sup> Hong-Juan Xu,<sup>a</sup> Li-Ce Yu,<sup>a</sup> Ming-Jie Lu,<sup>a</sup> Yan-Fang Shang,<sup>a</sup> Ying-Lin Song,<sup>c</sup> Wen-Hua Zhang,<sup>\*b</sup> and Jian-Ping Lang<sup>\*b</sup>

<sup>a</sup> *College of Chemistry and Chemical Engineering, Nantong University, Nantong 226019, China*

<sup>b</sup> *State and Local Joint Engineering Laboratory for Novel Functional Polymeric Materials, College of Chemistry, Chemical Engineering and Materials Science, Soochow University, Suzhou 215123, China*

<sup>c</sup> *School of Physical Science and Technology, Soochow University, Suzhou 215006, China*

## Table of Contents

|                                                                                                                                                                                                                                                                                                                                          |    |
|------------------------------------------------------------------------------------------------------------------------------------------------------------------------------------------------------------------------------------------------------------------------------------------------------------------------------------------|----|
| <b>Fig. S1</b> The FT-IR spectrum of <b>2</b> .....                                                                                                                                                                                                                                                                                      | S4 |
| <b>Fig. S2</b> The FT-IR spectrum of <b>3</b> .....                                                                                                                                                                                                                                                                                      | S4 |
| <b>Fig. S3</b> The FT-IR spectrum of <b>4</b> .....                                                                                                                                                                                                                                                                                      | S4 |
| <b>Fig. S4</b> The PXRD pattern of <b>2</b> , showing a good consistency between the experimental and the simulated diffraction patterns. ....                                                                                                                                                                                           | S5 |
| <b>Fig. S5</b> The PXRD pattern of <b>3</b> , showing a good consistency between the experimental and the simulated diffraction patterns. ....                                                                                                                                                                                           | S5 |
| <b>Fig. S6</b> The PXRD pattern of <b>4</b> , showing a good consistency between the experimental and the simulated diffraction patterns. ....                                                                                                                                                                                           | S5 |
| <b>Fig. S7</b> The TGA curve of <b>2</b> .....                                                                                                                                                                                                                                                                                           | S6 |
| <b>Fig. S8</b> The TGA curve of <b>3</b> .....                                                                                                                                                                                                                                                                                           | S6 |
| <b>Fig. S9</b> The TGA curve of <b>4</b> .....                                                                                                                                                                                                                                                                                           | S6 |
| <b>Fig. S10</b> The positive-ion ESI mass spectrum of $[\text{Tp}^*\text{WS}_3\text{Cu}_2(\text{CN})_2\text{Cu}](\text{pz})_{0.5}$ ( <b>2</b> ). The observed patterns (up) and the calculated isotope patterns (bottom) of the $[\text{Tp}^*\text{WS}_3\text{Cu}_2(\text{CN})\text{H}]^+$ cation (at $m/z = 731.9$ ). ....              | S7 |
| <b>Fig. S11</b> The negative-ion ESI mass spectrum of $[\text{Tp}^*\text{WS}_3\text{Cu}_2(\text{CN})_2\text{Cu}](\text{pz})_{0.5}$ ( <b>2</b> ). The observed patterns (up) and the calculated isotope patterns (bottom) of the $[\text{Tp}^*\text{WS}_3\text{Cu}_2(\text{CN})_2\text{CH}_3\text{OH}]^-$ anion (at $m/z = 788.8$ ). .... | S7 |
| <b>Fig. S12</b> The positive-ion ESI mass spectrum of $[\text{Tp}^*\text{WS}_3\text{Cu}_2(\text{CN})_2\text{Cu}](\text{bipy})_{0.5}$ ( <b>3</b> ). The observed patterns (up) and the calculated isotope patterns (bottom) of the $[\text{Tp}^*\text{WS}_3\text{Cu}_2(\text{CN})\text{H}]^+$ cation (at $m/z = 731.9$ ). ....            | S7 |
| <b>Fig. S13</b> The positive-ion ESI mass spectrum of $[\text{Tp}^*\text{WS}_3\text{Cu}_2(\text{CN})_2\text{Cu}](\text{bpb})_{0.5}$ ( <b>4</b> ). The observed patterns (up) and the calculated isotope patterns (bottom) of the $[\text{bpbH}]^+$ cation (at $m/z = 233.1$ ). ....                                                      | S7 |
| <b>Fig. S14</b> The positive-ion ESI mass spectrum of $[\text{Tp}^*\text{WS}_3\text{Cu}_2(\text{CN})_2\text{Cu}](\text{bpb})_{0.5}$ ( <b>4</b> ). The observed patterns (up) and the calculated isotope patterns (bottom) of the $[\text{Tp}^*\text{WS}_3\text{Cu}_2(\text{CN})_2\text{H}_2]^+$ cation (at $m/z = 758.9$ ). ....         | S7 |
| <b>Fig. S15</b> The negative-ion ESI mass spectrum of $[\text{Tp}^*\text{WS}_3\text{Cu}_2(\text{CN})_2\text{Cu}](\text{bpb})_{0.5}$ ( <b>4</b> ). The observed patterns (up) and the calculated                                                                                                                                          |    |

|                                                                                                                                                                                                                                                                                                                                                                                                       |     |
|-------------------------------------------------------------------------------------------------------------------------------------------------------------------------------------------------------------------------------------------------------------------------------------------------------------------------------------------------------------------------------------------------------|-----|
| isotope patterns (bottom) of the $[\text{Tp}^*\text{WS}_3\text{Cu}_2(\text{CN})_2]^-$ anion (at $m/z = 756.9$ ).....                                                                                                                                                                                                                                                                                  | S8  |
| <b>Fig. S16</b> The negative-ion ESI mass spectrum of $[\text{Tp}^*\text{WS}_3\text{Cu}_2(\text{CN})_2\text{Cu}](\text{bpb})_{0.5}$ ( <b>4</b> ). The observed patterns (up) and the calculated isotope patterns (bottom) of the $[\text{Tp}^*\text{WS}_3(\text{DMF})]^-$ anion (at $m/z = 650.0$ ).....                                                                                              | S8  |
| <b>Fig. S17</b> Crystal packing diagram of <b>2</b> looking along the $a$ direction. All hydrogen atoms are omitted. Color codes: W (red), Cu (cyan), S (yellow), N (blue), C (black), B (dark orange). .....                                                                                                                                                                                         | S9  |
| <b>Fig. S18</b> Crystal packing diagram of <b>3</b> looking along the $b$ direction. All hydrogen atoms are omitted. Color codes: W (red), Cu (cyan), S (yellow), N (blue), C (black), B (dark orange), O (pink).....                                                                                                                                                                                 | S9  |
| <b>Fig. S19</b> Crystal packing diagram of <b>4</b> looking along the $b$ direction. All hydrogen atoms are omitted. Color codes: W (red), Cu (cyan), S (yellow), N (blue), C (black), B (dark orange), O (pink).....                                                                                                                                                                                 | S9  |
| <b>Fig. S20</b> Z-scan data of a $8.3 \times 10^{-5} \text{ mol}\cdot\text{L}^{-1}$ solution of <b>3</b> in DMF at 532 nm. (a) Normalized Z-scan data under open-aperture conditions. (b) Curves obtained by dividing the normalized Z-scan data under closed aperture configuration by that in (a). The black squares are the experimental data, and the red solid curve is the theoretical fit..... | S10 |
| <b>Fig. S21</b> Z-scan data of a $8.3 \times 10^{-5} \text{ mol}\cdot\text{L}^{-1}$ solution of <b>4</b> in DMF at 532 nm. (a) Normalized Z-scan data under open-aperture conditions. (b) Curves obtained by dividing the normalized Z-scan data under closed aperture configuration by that in (a). The black squares are the experimental data, and the red solid curve is the theoretical fit..... | S10 |
| <b>Table S1</b> Selected bond lengths ( $\text{\AA}$ ) and angles ( $^\circ$ ) for <b>2-4<sup>a</sup></b> .....                                                                                                                                                                                                                                                                                       | S11 |

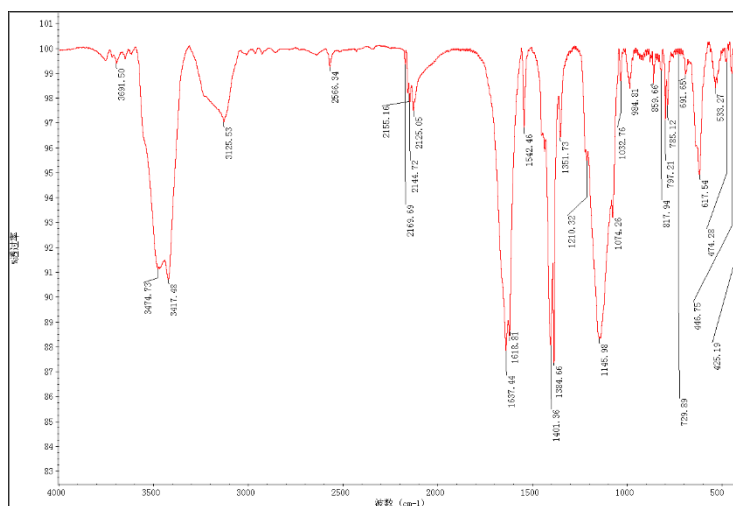

Fig. S1 The FT-IR spectrum of 2.

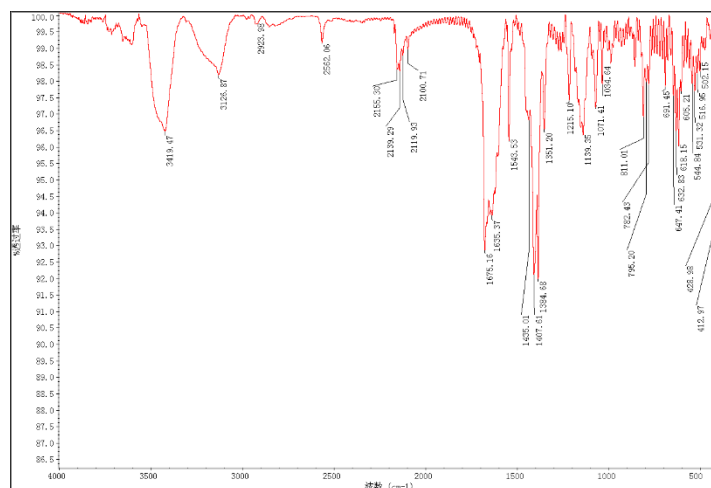

Fig. S2 The FT-IR spectrum of 3.

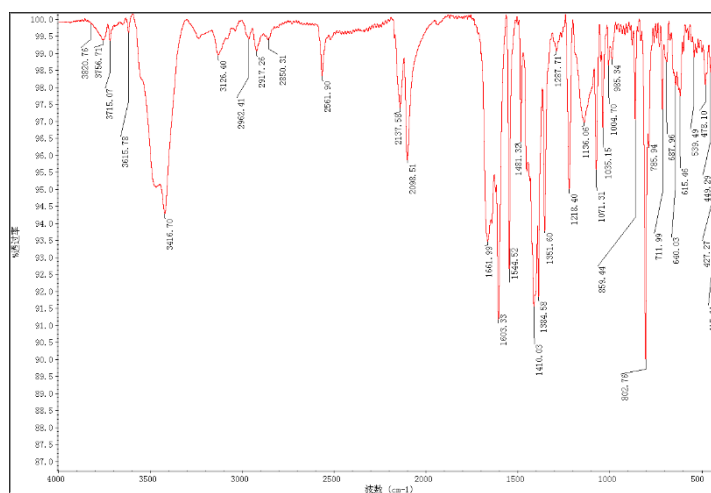

Fig. S3 The FT-IR spectrum of 4.

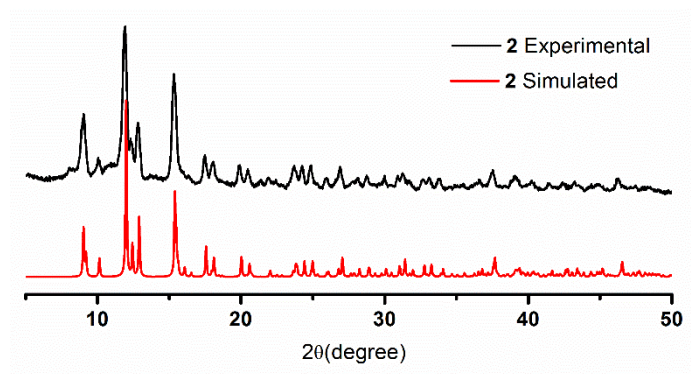

**Fig. S4** The PXRD pattern of **2**, showing a good consistency between the experimental and the simulated diffraction patterns.

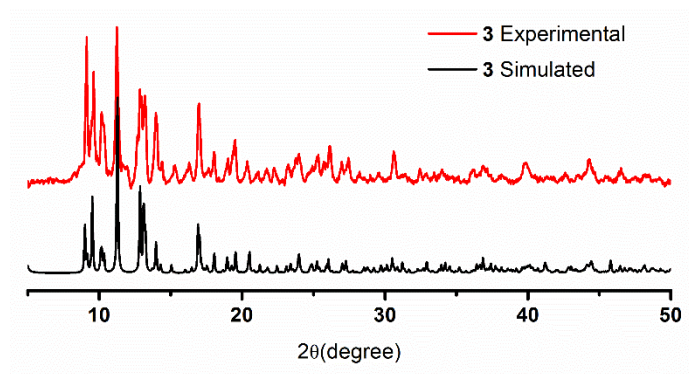

**Fig. S5** The PXRD pattern of **3**, showing a good consistency between the experimental and the simulated diffraction patterns.

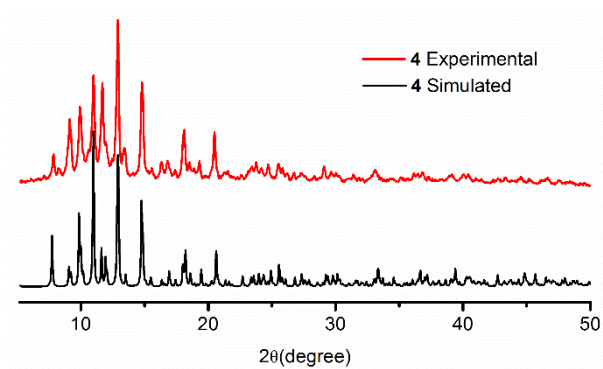

**Fig. S6** The PXRD pattern of **4**, showing a good consistency between the experimental and the simulated diffraction patterns.

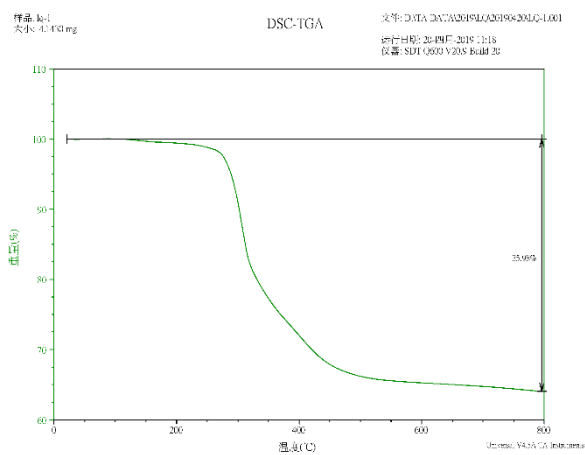

**Fig. S7** The TGA curve of 2.

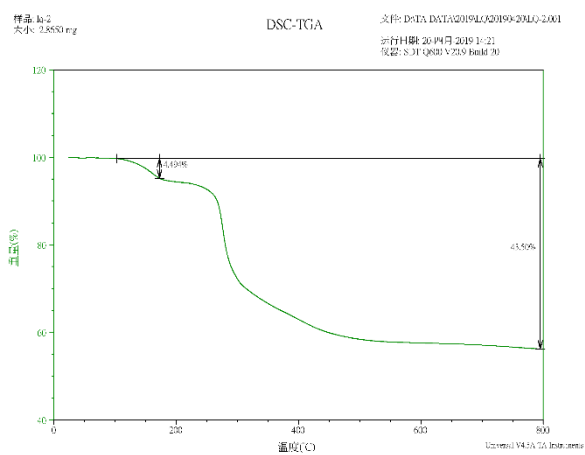

**Fig. S8** The TGA curve of 3.

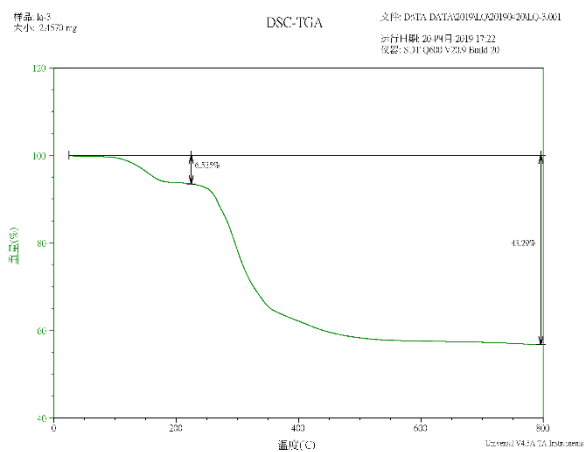

**Fig. S9** The TGA curve of 4.

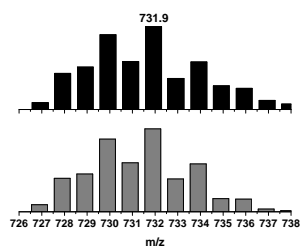

**Fig. S10** The positive-ion ESI mass spectrum of  $[\text{Tp}^*\text{WS}_3\text{Cu}_2(\text{CN})_2\text{Cu}](\text{pz})_{0.5}$  (**2**). The observed patterns (up) and the calculated isotope patterns (bottom) of the  $[\text{Tp}^*\text{WS}_3\text{Cu}_2(\text{CN})\text{H}]^+$  cation (at  $m/z = 731.9$ ).

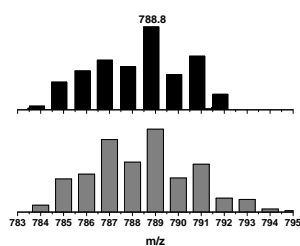

**Fig. S11** The negative-ion ESI mass spectrum of  $[\text{Tp}^*\text{WS}_3\text{Cu}_2(\text{CN})_2\text{Cu}](\text{pz})_{0.5}$  (**2**). The observed patterns (up) and the calculated isotope patterns (bottom) of the  $[\text{Tp}^*\text{WS}_3\text{Cu}_2(\text{CN})_2\text{CH}_3\text{OH}]^-$  anion (at  $m/z = 788.8$ ).

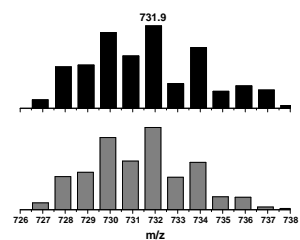

**Fig. S12** The positive-ion ESI mass spectrum of  $[\text{Tp}^*\text{WS}_3\text{Cu}_2(\text{CN})_2\text{Cu}](\text{bipy})_{0.5}$  (**3**). The observed patterns (up) and the calculated isotope patterns (bottom) of the  $[\text{Tp}^*\text{WS}_3\text{Cu}_2(\text{CN})\text{H}]^+$  cation (at  $m/z = 731.9$ ).

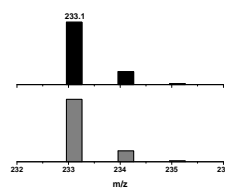

**Fig. S13** The positive-ion ESI mass spectrum of  $[\text{Tp}^*\text{WS}_3\text{Cu}_2(\text{CN})_2\text{Cu}](\text{bpb})_{0.5}$  (**4**). The observed patterns (up) and the calculated isotope patterns (bottom) of the  $[\text{bpbH}]^+$  cation (at  $m/z = 233.1$ ).

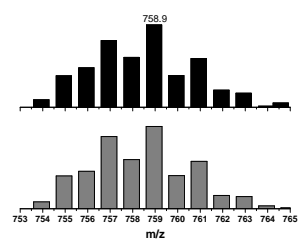

**Fig. S14** The positive-ion ESI mass spectrum of  $[\text{Tp}^*\text{WS}_3\text{Cu}_2(\text{CN})_2\text{Cu}](\text{bpb})_{0.5}$  (**4**). The observed patterns (up) and the calculated isotope patterns (bottom) of the  $[\text{Tp}^*\text{WS}_3\text{Cu}_2(\text{CN})_2\text{H}_2]^+$  cation (at  $m/z = 758.9$ ).

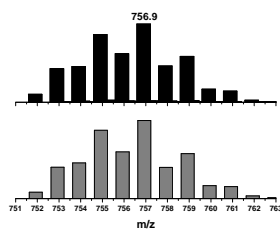

**Fig. S15** The negative-ion ESI mass spectrum of  $[\text{Tp}^*\text{WS}_3\text{Cu}_2(\text{CN})_2\text{Cu}](\text{bpb})_{0.5}$  (**4**). The observed patterns (up) and the calculated isotope patterns (bottom) of the  $[\text{Tp}^*\text{WS}_3\text{Cu}_2(\text{CN})_2]^-$  anion (at  $m/z = 756.9$ ).

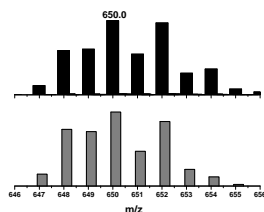

**Fig. S16** The negative-ion ESI mass spectrum of  $[\text{Tp}^*\text{WS}_3\text{Cu}_2(\text{CN})_2\text{Cu}](\text{bpb})_{0.5}$  (**4**). The observed patterns (up) and the calculated isotope patterns (bottom) of the  $[\text{Tp}^*\text{WS}_3(\text{DMF})]^-$  anion (at  $m/z = 650.0$ ).



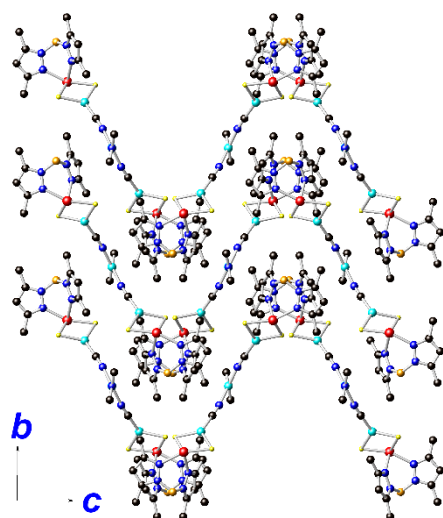

**Fig. S17** Crystal packing diagram of **2** looking along the *a* direction. All hydrogen atoms are omitted. Color codes: W (red), Cu (cyan), S (yellow), N (blue), C (black), B (dark orange).

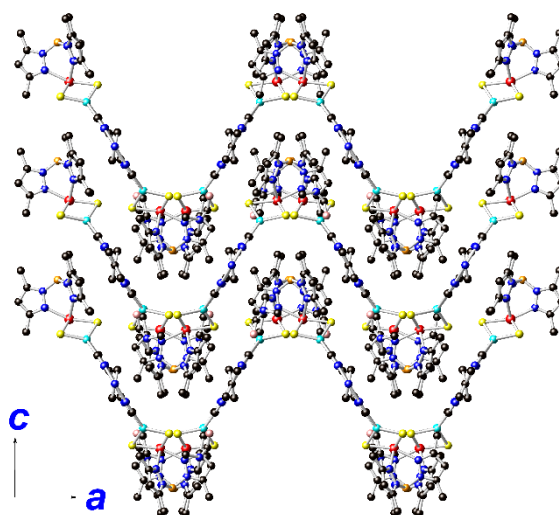

**Fig. S18** Crystal packing diagram of **3** looking along the *b* direction. All hydrogen atoms are omitted. Color codes: W (red), Cu (cyan), S (yellow), N (blue), C (black), B (dark orange), O (pink).

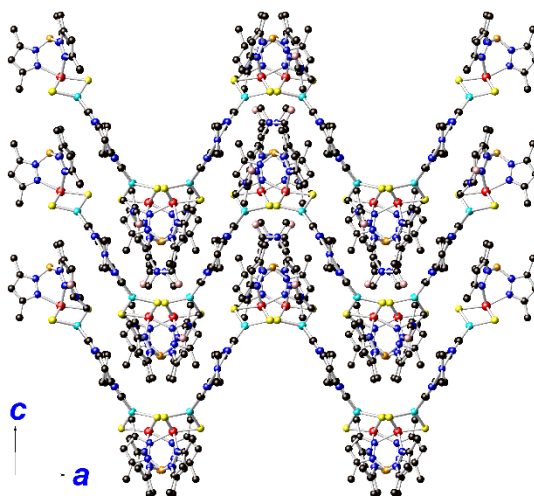

**Fig. S19** Crystal packing diagram of **4** looking along the *b* direction. All hydrogen atoms are omitted. Color codes: W (red), Cu (cyan), S (yellow), N (blue), C (black), B (dark orange), O (pink).

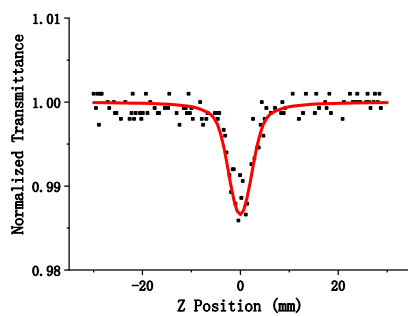

(a)

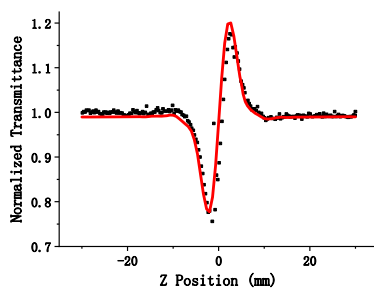

(b)

**Fig. S20** Z-scan data of a  $8.3 \times 10^{-5} \text{ mol}\cdot\text{L}^{-1}$  solution of **3** in DMF at 532 nm. (a) Normalized Z-scan data under open-aperture conditions. (b) Curves obtained by dividing the normalized Z-scan data under closed aperture configuration by that in (a). The black squares are the experimental data, and the red solid curve is the theoretical fit.

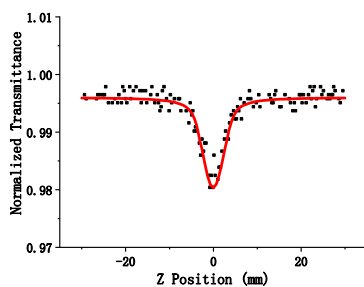

(a)

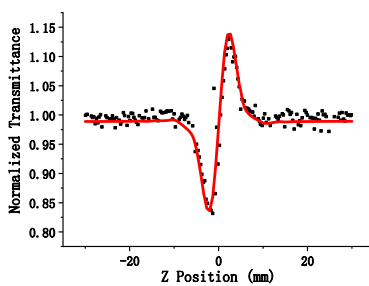

(b)

**Fig. S21** Z-scan data of a  $8.3 \times 10^{-5} \text{ mol}\cdot\text{L}^{-1}$  solution of **4** in DMF at 532 nm. (a) Normalized Z-scan data under open-aperture conditions. (b) Curves obtained by dividing the normalized Z-scan data under closed aperture configuration by that in (a). The black squares are the experimental data, and the red solid curve is the theoretical fit.

**Table S1** Selected bond lengths (Å) and angles (°) for **2-4<sup>a</sup>**

| Complex <b>2</b>    |            |                     |            |
|---------------------|------------|---------------------|------------|
| W(1)-N(6)           | 2.239(9)   | W(1)-S(2)           | 2.241(2)   |
| W(1)-S(2)#1         | 2.241(2)   | W(1)-N(4)#1         | 2.314(7)   |
| W(1)-N(4)           | 2.314(7)   | W(1)-S(1)           | 2.335(3)   |
| W(1)-Cu(1)#1        | 2.6294(11) | W(1)-Cu(1)          | 2.6294(11) |
| Cu(1)-C(1)          | 1.879(9)   | Cu(1)-S(2)          | 2.204(2)   |
| Cu(1)-S(1)          | 2.216(2)   | Cu(1)-Cu(1)#1       | 2.896(2)   |
| Cu(2)-N(1)#2        | 1.896(8)   | Cu(2)-N(1)          | 1.896(8)   |
| Cu(2)-N(2)          | 2.025(11)  | S(1)-Cu(1)#1        | 2.216(2)   |
|                     |            |                     |            |
| N(6)-W(1)-S(2)      | 87.52(17)  | N(6)-W(1)-S(2)#1    | 87.52(17)  |
| S(2)-W(1)-S(2)#1    | 100.63(12) | N(6)-W(1)-N(4)#1    | 79.3(3)    |
| S(2)-W(1)-N(4)#1    | 164.15(19) | S(2)#1-W(1)-N(4)#1  | 87.68(19)  |
| N(6)-W(1)-N(4)      | 79.3(3)    | S(2)-W(1)-N(4)      | 87.68(19)  |
| S(2)#1-W(1)-N(4)    | 164.15(19) | N(4)#1-W(1)-N(4)    | 81.3(4)    |
| N(6)-W(1)-S(1)      | 159.9(3)   | S(2)-W(1)-S(1)      | 105.03(7)  |
| S(2)#1-W(1)-S(1)    | 105.03(7)  | N(4)#1-W(1)-S(1)    | 85.51(18)  |
| N(4)-W(1)-S(1)      | 85.51(18)  | N(6)-W(1)-Cu(1)#1   | 140.07(13) |
| S(2)-W(1)-Cu(1)#1   | 104.29(6)  | S(2)#1-W(1)-Cu(1)#1 | 53.09(6)   |
| N(4)#1-W(1)-Cu(1)#1 | 91.50(18)  | N(4)-W(1)-Cu(1)#1   | 138.02(17) |
| S(1)-W(1)-Cu(1)#1   | 52.61(6)   | N(6)-W(1)-Cu(1)     | 140.07(13) |
| S(2)-W(1)-Cu(1)     | 53.09(6)   | S(2)#1-W(1)-Cu(1)   | 104.29(6)  |
| N(4)#1-W(1)-Cu(1)   | 138.02(17) | N(4)-W(1)-Cu(1)     | 91.50(18)  |
| S(1)-W(1)-Cu(1)     | 52.61(6)   | Cu(1)#1-W(1)-Cu(1)  | 66.82(5)   |
| C(1)-Cu(1)-S(2)     | 124.3(3)   | C(1)-Cu(1)-S(1)     | 125.1(3)   |
| S(2)-Cu(1)-S(1)     | 110.48(10) | C(1)-Cu(1)-W(1)     | 174.8(3)   |
| S(2)-Cu(1)-W(1)     | 54.37(6)   | S(1)-Cu(1)-W(1)     | 56.85(7)   |
| C(1)-Cu(1)-Cu(1)#1  | 120.2(3)   | S(2)-Cu(1)-Cu(1)#1  | 97.20(6)   |
| S(1)-Cu(1)-Cu(1)#1  | 49.20(5)   | W(1)-Cu(1)-Cu(1)#1  | 56.59(2)   |

|                   |          |                    |           |
|-------------------|----------|--------------------|-----------|
| N(1)#2-Cu(2)-N(1) | 133.1(5) | N(1)#2-Cu(2)-N(2)  | 113.5(2)  |
| N(1)-Cu(2)-N(2)   | 113.5(2) | Cu(1)-S(1)-Cu(1)#1 | 81.60(11) |
| Cu(1)-S(1)-W(1)   | 70.54(8) | Cu(1)#1-S(1)-W(1)  | 70.54(8)  |
| Cu(1)-S(2)-W(1)   | 72.54(7) | C(1)-N(1)-Cu(2)    | 172.4(7)  |
| C(2)#2-N(2)-Cu(2) | 121.9(5) | C(2)-N(2)-Cu(2)    | 121.9(5)  |
| C(6)-N(4)-W(1)    | 134.1(6) | N(3)-N(4)-W(1)     | 120.6(5)  |
| C(11)-N(6)-W(1)   | 130.5(9) | N(5)-N(6)-W(1)     | 122.1(7)  |
| N(1)-C(1)-Cu(1)   | 176.7(8) |                    |           |

### Complex 3

|                 |            |                 |            |
|-----------------|------------|-----------------|------------|
| W(1)-N(8)       | 2.229(4)   | W(1)-S(1)       | 2.2333(12) |
| W(1)-S(3)       | 2.2489(12) | W(1)-N(6)       | 2.288(4)   |
| W(1)-N(10)      | 2.317(4)   | W(1)-S(2)       | 2.3334(11) |
| W(1)-Cu(2)      | 2.6224(6)  | W(1)-Cu(1)      | 2.6254(6)  |
| Cu(1)-C(1)      | 1.880(4)   | Cu(1)-S(1)      | 2.1993(12) |
| Cu(1)-S(2)      | 2.2132(12) | Cu(1)-Cu(2)     | 2.8779(9)  |
| Cu(2)-C(2)      | 1.879(5)   | Cu(2)-S(3)      | 2.1968(13) |
| Cu(2)-S(2)      | 2.2169(12) | Cu(3)-N(1)      | 1.910(4)   |
| Cu(3)-N(1)#1    | 1.910(4)   | Cu(3)-N(3)      | 2.015(5)   |
| Cu(4)-N(2)      | 1.889(4)   | Cu(4)-N(2)#1    | 1.889(4)   |
| Cu(4)-N(4)#2    | 2.026(6)   | N(4)-Cu(4)#3    | 2.026(6)   |
| N(8)-W(1)-S(1)  | 86.87(10)  | N(8)-W(1)-S(3)  | 86.33(10)  |
| S(1)-W(1)-S(3)  | 100.90(4)  | N(8)-W(1)-N(6)  | 79.57(13)  |
| S(1)-W(1)-N(6)  | 88.50(10)  | S(3)-W(1)-N(6)  | 162.63(10) |
| N(8)-W(1)-N(10) | 80.10(13)  | S(1)-W(1)-N(10) | 164.35(9)  |
| S(3)-W(1)-N(10) | 86.98(9)   | N(6)-W(1)-N(10) | 80.68(13)  |
| N(8)-W(1)-S(2)  | 161.42(10) | S(1)-W(1)-S(2)  | 105.05(4)  |
| S(3)-W(1)-S(2)  | 104.86(4)  | N(6)-W(1)-S(2)  | 86.45(9)   |
| N(10)-W(1)-S(2) | 85.65(9)   | N(8)-W(1)-Cu(2) | 138.99(10) |
| S(1)-W(1)-Cu(2) | 103.72(3)  | S(3)-W(1)-Cu(2) | 52.94(3)   |

|                   |            |                     |            |
|-------------------|------------|---------------------|------------|
| N(6)-W(1)-Cu(2)   | 139.08(9)  | N(10)-W(1)-Cu(2)    | 91.84(9)   |
| S(2)-W(1)-Cu(2)   | 52.76(3)   | N(8)-W(1)-Cu(1)     | 139.60(10) |
| S(1)-W(1)-Cu(1)   | 53.08(3)   | S(3)-W(1)-Cu(1)     | 104.53(3)  |
| N(6)-W(1)-Cu(1)   | 92.80(9)   | N(10)-W(1)-Cu(1)    | 138.18(9)  |
| S(2)-W(1)-Cu(1)   | 52.62(3)   | Cu(2)-W(1)-Cu(1)    | 66.516(19) |
| C(1)-Cu(1)-S(1)   | 124.43(13) | C(1)-Cu(1)-S(2)     | 124.98(13) |
| S(1)-Cu(1)-S(2)   | 110.46(5)  | C(1)-Cu(1)-W(1)     | 175.26(13) |
| S(1)-Cu(1)-W(1)   | 54.28(3)   | S(2)-Cu(1)-W(1)     | 56.90(3)   |
| C(1)-Cu(1)-Cu(2)  | 120.49(13) | S(1)-Cu(1)-Cu(2)    | 96.91(4)   |
| S(2)-Cu(1)-Cu(2)  | 49.54(3)   | W(1)-Cu(1)-Cu(2)    | 56.691(16) |
| C(2)-Cu(2)-S(3)   | 123.17(16) | C(2)-Cu(2)-S(2)     | 125.73(16) |
| S(3)-Cu(2)-S(2)   | 110.77(5)  | C(2)-Cu(2)-W(1)     | 175.80(16) |
| S(3)-Cu(2)-W(1)   | 54.78(3)   | S(2)-Cu(2)-W(1)     | 56.92(3)   |
| C(2)-Cu(2)-Cu(1)  | 121.70(14) | S(3)-Cu(2)-Cu(1)    | 98.21(4)   |
| S(2)-Cu(2)-Cu(1)  | 49.43(3)   | W(1)-Cu(2)-Cu(1)    | 56.793(16) |
| N(1)-Cu(3)-N(1)#1 | 130.8(2)   | N(1)-Cu(3)-N(3)     | 114.58(12) |
| N(1)#1-Cu(3)-N(3) | 114.58(12) | N(2)-Cu(4)-N(2)#1   | 133.1(3)   |
| N(2)-Cu(4)-N(4)#2 | 113.43(14) | N(2)#1-Cu(4)-N(4)#2 | 113.43(14) |
| Cu(1)-S(1)-W(1)   | 72.64(4)   | Cu(1)-S(2)-Cu(2)    | 81.03(4)   |
| Cu(1)-S(2)-W(1)   | 70.49(3)   | Cu(2)-S(2)-W(1)     | 70.33(3)   |
| Cu(2)-S(3)-W(1)   | 72.28(4)   | C(1)-N(1)-Cu(3)     | 174.1(4)   |
| C(2)-N(2)-Cu(4)   | 174.6(4)   | C(3)#1-N(3)-Cu(3)   | 121.3(3)   |
| C(3)-N(3)-Cu(3)   | 121.3(3)   | C(8)#1-N(4)-Cu(4)#3 | 121.5(3)   |
| C(8)-N(4)-Cu(4)#3 | 121.5(3)   | C(12)-N(6)-W(1)     | 132.9(3)   |
| N(5)-N(6)-W(1)    | 121.5(3)   | C(17)-N(8)-W(1)     | 131.7(3)   |
| N(7)-N(8)-W(1)    | 121.8(3)   | C(22)-N(10)-W(1)    | 133.2(3)   |
| N(9)-N(10)-W(1)   | 120.9(3)   | N(1)-C(1)-Cu(1)     | 175.7(4)   |
| N(2)-C(2)-Cu(2)   | 176.6(4)   |                     |            |

## Complex 4

|                  |            |                  |            |
|------------------|------------|------------------|------------|
| W(1)-N(8)        | 2.224(9)   | W(1)-S(1)        | 2.234(3)   |
| W(1)-S(3)        | 2.250(3)   | W(1)-N(6)        | 2.279(10)  |
| W(1)-N(10)       | 2.311(10)  | W(1)-S(2)        | 2.333(3)   |
| W(1)-Cu(2)       | 2.6190(16) | W(1)-Cu(1)       | 2.6260(16) |
| Cu(1)-C(1)       | 1.887(12)  | Cu(1)-S(1)       | 2.196(3)   |
| Cu(1)-S(2)       | 2.218(3)   | Cu(1)-Cu(2)      | 2.890(2)   |
| Cu(2)-C(2)       | 1.865(14)  | Cu(2)-S(3)       | 2.197(4)   |
| Cu(2)-S(2)       | 2.217(3)   | Cu(3)-N(1)#1     | 1.911(12)  |
| Cu(3)-N(1)       | 1.911(12)  | Cu(3)-N(3)       | 1.996(17)  |
| Cu(4)-N(2)       | 1.919(11)  | Cu(4)-N(2)#1     | 1.919(11)  |
| Cu(4)-N(4)#2     | 1.995(17)  | N(4)-Cu(4)#3     | 1.995(17)  |
|                  |            |                  |            |
| N(8)-W(1)-S(1)   | 86.6(3)    | N(8)-W(1)-S(3)   | 86.8(3)    |
| S(1)-W(1)-S(3)   | 101.00(12) | N(8)-W(1)-N(6)   | 78.8(4)    |
| S(1)-W(1)-N(6)   | 88.7(3)    | S(3)-W(1)-N(6)   | 162.2(3)   |
| N(8)-W(1)-N(10)  | 79.9(3)    | S(1)-W(1)-N(10)  | 164.3(3)   |
| S(3)-W(1)-N(10)  | 86.5(3)    | N(6)-W(1)-N(10)  | 80.7(4)    |
| N(8)-W(1)-S(2)   | 161.1(3)   | S(1)-W(1)-S(2)   | 105.09(11) |
| S(3)-W(1)-S(2)   | 104.95(12) | N(6)-W(1)-S(2)   | 86.6(3)    |
| N(10)-W(1)-S(2)  | 86.0(2)    | N(8)-W(1)-Cu(2)  | 139.5(3)   |
| S(1)-W(1)-Cu(2)  | 103.87(9)  | S(3)-W(1)-Cu(2)  | 52.98(9)   |
| N(6)-W(1)-Cu(2)  | 139.2(2)   | N(10)-W(1)-Cu(2) | 91.7(2)    |
| S(2)-W(1)-Cu(2)  | 52.79(8)   | N(8)-W(1)-Cu(1)  | 139.2(3)   |
| S(1)-W(1)-Cu(1)  | 52.98(9)   | S(3)-W(1)-Cu(1)  | 104.86(9)  |
| N(6)-W(1)-Cu(1)  | 93.0(3)    | N(10)-W(1)-Cu(1) | 138.7(2)   |
| S(2)-W(1)-Cu(1)  | 52.73(8)   | Cu(2)-W(1)-Cu(1) | 66.86(5)   |
| C(1)-Cu(1)-S(1)  | 124.2(4)   | C(1)-Cu(1)-S(2)  | 125.2(4)   |
| S(1)-Cu(1)-S(2)  | 110.47(13) | C(1)-Cu(1)-W(1)  | 175.8(4)   |
| S(1)-Cu(1)-W(1)  | 54.31(9)   | S(2)-Cu(1)-W(1)  | 56.84(8)   |
| C(1)-Cu(1)-Cu(2) | 121.4(4)   | S(1)-Cu(1)-Cu(2) | 96.70(11)  |

|                      |            |                     |           |
|----------------------|------------|---------------------|-----------|
| S(2)-Cu(1)-Cu(2)     | 49.31(9)   | W(1)-Cu(1)-Cu(2)    | 56.45(5)  |
| C(2)-Cu(2)-S(3)      | 124.2(5)   | C(2)-Cu(2)-S(2)     | 124.5(5)  |
| S(3)-Cu(2)-S(2)      | 110.91(13) | C(2)-Cu(2)-W(1)     | 177.1(5)  |
| S(3)-Cu(2)-W(1)      | 54.87(9)   | S(2)-Cu(2)-W(1)     | 56.97(8)  |
| C(2)-Cu(2)-Cu(1)     | 121.9(4)   | S(3)-Cu(2)-Cu(1)    | 98.21(11) |
| S(2)-Cu(2)-Cu(1)     | 49.36(9)   | W(1)-Cu(2)-Cu(1)    | 56.69(5)  |
| N(1)#1-Cu(3)-N(1)    | 129.7(7)   | N(1)#1-Cu(3)-N(3)   | 115.2(3)  |
| N(1)-Cu(3)-N(3)      | 115.2(3)   | N(2)-Cu(4)-N(2)#1   | 135.2(7)  |
| N(2)-Cu(4)-N(4)#2    | 112.4(4)   | N(2)#1-Cu(4)-N(4)#2 | 112.4(4)  |
| Cu(1)-S(1)-W(1)      | 72.71(10)  | Cu(2)-S(2)-Cu(1)    | 81.33(11) |
| Cu(2)-S(2)-W(1)      | 70.23(9)   | Cu(1)-S(2)-W(1)     | 70.43(9)  |
| Cu(2)-S(3)-W(1)      | 72.15(11)  | C(1)-N(1)-Cu(3)     | 173.6(11) |
| C(2)-N(2)-Cu(4)      | 174.5(13)  | C(3)#1-N(3)-Cu(3)   | 121.9(8)  |
| C(3)-N(3)-Cu(3)      | 121.9(8)   | C(12)-N(4)-Cu(4)#3  | 122.1(11) |
| C(12)#1-N(4)-Cu(4)#3 | 122.1(11)  | C(16)-N(6)-W(1)     | 132.5(8)  |
| N(5)-N(6)-W(1)       | 121.9(8)   | N(7)-N(8)-W(1)      | 122.8(7)  |
| C(21)-N(8)-W(1)      | 130.8(8)   | N(9)-N(10)-W(1)     | 120.9(8)  |
| C(26)-N(10)-W(1)     | 133.2(8)   | N(1)-C(1)-Cu(1)     | 175.0(11) |
| N(2)-C(2)-Cu(2)      | 174.4(13)  |                     |           |

<sup>a</sup> Symmetry codes for **2**: #1  $-x, y, z$ ; #2  $x, -y + 1, -z$ ; #3  $-x + 1, y, z$ ; for **3**: #1  $-x, y, -z - 1/2$ ; #2  $x, y + 1, z$ ; #3  $x, y - 1, z$ ; for **4**: #1  $-x + 2, y, -z + 1/2$ ; #2  $x, y + 1, z$ ; #3  $x, y - 1, z$ .
